# Supplementary material for: Hepatic metabolic response to restricted copper intake in a Niemann–Pick C murine model
Source: Royal Society of Chemistry journal article supplement (doi:10.1039/c4mt00056k), 2014-01-01
Supplement: c4mt00056k2.pdf [file c4mt00056k2.pdf]

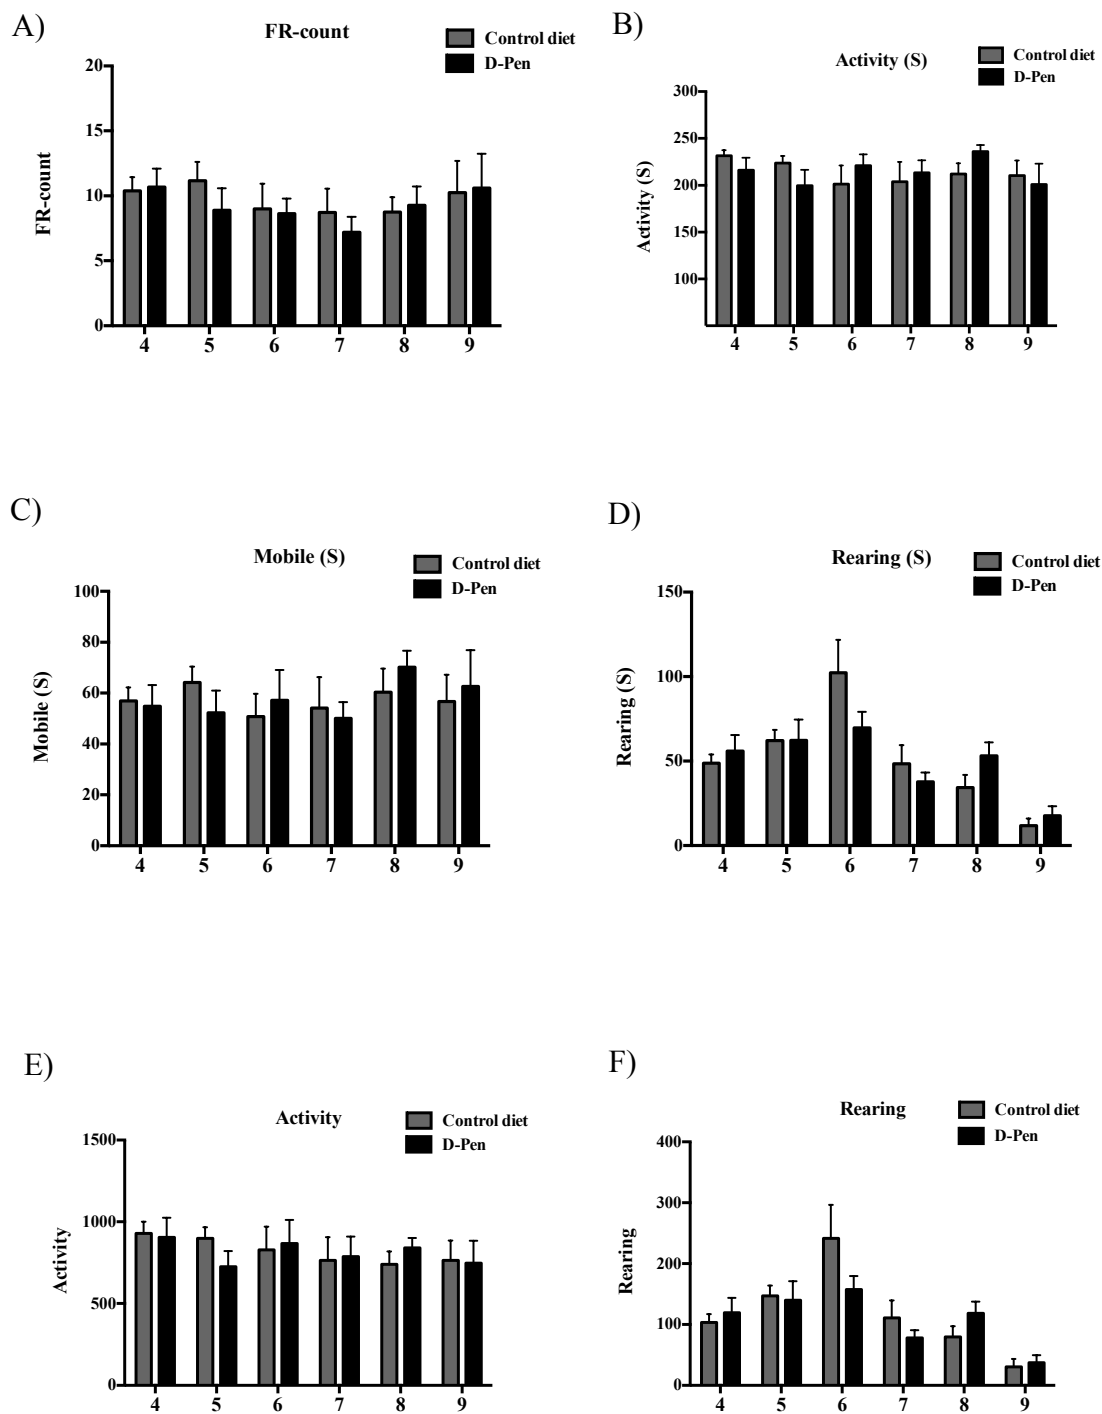

**Figure S2. Copper chelating reagent, D-Penicillamine, revealed limited therapeutic effects on locomotor and exploring activities in treated *Npc1*<sup>-/-</sup> mice.** (A-F) D-Penicillamine treatment started at 3 weeks of age. Age-matched *Npc1*<sup>-/-</sup> mice were fed with normal powdered diet as a control group. Data shown mean  $\pm$  SEM, n = 4.
