# Supplementary material for: Hepatic metabolic response to restricted copper intake in a Niemann–Pick C murine model
Source: Royal Society of Chemistry journal article supplement (doi:10.1039/c4mt00056k), 2014-01-01
Supplement: c4mt00056k5.pdf [file c4mt00056k5.pdf]

Table 3S. Analysis of iron-related gene expression patterns in 4- and 7-week-old *Npc1*<sup>+/+</sup> and *Npc1*<sup>-/-</sup> mice.

| Genotype/diet <sup>a</sup>     | <i>TfR</i>               | <i>FtH</i>   | <i>FtL</i>    | <i>Dmt1</i> | <i>Fpn</i>   | <i>Hepc</i>   |
|--------------------------------|--------------------------|--------------|---------------|-------------|--------------|---------------|
| <i>Npc1</i> <sup>+/+</sup> BM  | 1127.6±73.5 <sup>b</sup> | 3157.2±530.0 | 3509.4±162.6  | 31.9±2.7    | 1317.4±150.5 | 2434.2±241.6  |
| <i>Npc1</i> <sup>-/-</sup> BM  | 1418.1±67.1*             | 3094.7±214.5 | 2584.9±221.9* | 36.8±6.4    | 853.8±60.8*  | 3229.7±206.9* |
| <i>Npc1</i> <sup>+/+</sup> CuA | 1051.4±63.4              | 3593.9±365.3 | 2566.1±29.7   | 30.0±1.3    | 1250.5±158.7 | 2388.2±182.1  |
| <i>Npc1</i> <sup>-/-</sup> CuA | 1841.2±285.0*            | 3221.9±137.1 | 2161.6±143.2* | 26.5±2.6    | 800.9±36.9*  | 1768.2±203.3* |

<sup>a</sup>Breast milk (BM), control diet (CuA).

<sup>b</sup>Normalized transcript abundance, expressed as mean ±SEM.

\**p* < 0.05 for differences between genotypes (Mann Whitney-U test), n=5.
