# Supplementary material for: Hepatic metabolic response to restricted copper intake in a Niemann–Pick C murine model
Source: Royal Society of Chemistry journal article supplement (doi:10.1039/c4mt00056k), 2014-01-01
Supplement: c4mt00056k6.pdf [file c4mt00056k6.pdf]

Table 4S. Analysis of copper-related gene expression patterns in 5-week-old *Npc1*<sup>+/+</sup> and *Npc1*<sup>-/-</sup> mice

| Genotype/diet <sup>a</sup>     | <i>Ctrl</i>            | <i>Atox</i> | <i>Atp7b</i> | <i>Cp</i>   | <i>Commd1</i> | <i>Mt1</i> |
|--------------------------------|------------------------|-------------|--------------|-------------|---------------|------------|
| <i>Npc1</i> <sup>+/+</sup> CuA | 135.4±6.7 <sup>b</sup> | 454.1±35.0  | 52.6±5.8     | 873.0±71.3  | 110.7±5.8     | 110.0±4.1  |
| <i>Npc1</i> <sup>+/+</sup> CuD | 153.0±8.2              | 513.5±23.4  | 48.2±5.8     | 770.6±54.7  | 99.4±6.8      | 100.0±7.1  |
| <i>Npc1</i> <sup>-/-</sup> CuA | 150.9±11.8             | 362.7±32.7  | 63.5±4.7     | 1018.2±70.0 | 105.4±7.3     | 154.0±11.7 |
| <i>Npc1</i> <sup>-/-</sup> CuD | 167.3±7.0              | 411.7±30.0  | 61.3±3.8     | 762.6±48.4* | 123.1±8.8     | 66.0±2.1*  |

<sup>a</sup>Control diet (CuA) and copper-deficient diet (CuD).

<sup>b</sup>Normalized transcript abundance, expressed as mean ±SEM.

\**p* < 0.05 for differences between diets (Mann Whitney-U test), n=5.
